# Supplementary material
Source: HighWire-hosted journal article supplement (http://www.jrheum.org/highwire/filestream/29747/field_highwire_adjunct_files/0/150312DataSuppl.pdf)
Supplement: 150312DataSuppl.pdf [file 150312DataSuppl.pdf]

## ONLINE SUPPLEMENTARY DATA

*Supplementary Table 1.* International Classification of Disease (ICD) codes used to identify the diseases of interest, and used to exclude those diseases in the general population cohort

| <b>Cohort</b>                            | <b>ICD-9/ICD-10 diagnosis codes</b>                  |
|------------------------------------------|------------------------------------------------------|
| <i>Inflammatory bowel disease</i>        | 555/K50, 556/K51                                     |
| <i>Multiple sclerosis</i>                | 340/G35                                              |
| <i>Rheumatoid arthritis</i>              | 714/ M05, M06                                        |
| <i>General population cohort</i>         |                                                      |
| Crohn's disease                          | 555/K50                                              |
| Ulcerative colitis                       | 556/K51                                              |
| Optic neuritis                           | 377.3/H46                                            |
| Acute transverse myelitis                | 323.82/G37                                           |
| Acute disseminated encephalomyelitis     | 323/G36.9                                            |
| Demyelinating disease of CNS unspecified | 341.9/G37.8                                          |
| Other acute disseminated demyelination   | G36                                                  |
| MS                                       | 340/G35                                              |
| Neuromyelitis optica                     | 341.0/G36.0                                          |
| Systemic lupus erythematosus             | 710.0/M32                                            |
| Psoriatic arthritis                      | 696.0/M07                                            |
| Inflammatory spondyloarthropathies       | 720/M45-M49                                          |
| Connective tissue disease                | 710/ M30-M36                                         |
| Inflammatory polyarthropathies           | M02, M03, M07, M081, M082,<br>M083, M084, M088, M089 |

**Supplementary Table 2.** Classification of immunomodulatory and immunosuppressive therapies in rheumatoid arthritis, with Anatomic Therapeutic Chemical Classification System (ATC) codes

| Treatment                                                       | Disease | Rheumatoid Arthritis                                                                                                                                                      |
|-----------------------------------------------------------------|---------|---------------------------------------------------------------------------------------------------------------------------------------------------------------------------|
| <b>Corticosteroids</b>                                          |         | Methylprednisolone (H02AB04)<br>Prednisolone (H02AB06)<br>Prednisone (H02AB07)<br>Triamcinolone (H02AB08)<br>Cortisone (H02AB10)                                          |
| <b>Immunomodulatory therapies</b>                               |         | Sulfasalazine (A07EC01)<br>sodium aurothiomalate (M01CB01)<br>auranofin (M01CB03)<br>aurothioglucose (M01CB04)<br>Penicillamine (M01CC01)<br>Hydroxychloroquine (P01BA02) |
| <b>Traditional immunosuppressive therapies<sup>1</sup></b>      |         | Cyclophosphamide (L01AA01)<br>methotrexate (L01BA01, L04AX03)<br>Cyclosporine (L04AA01)<br>Leflunomide (L04AA13)<br>Azathioprine (L04AX01)                                |
| <b>Novel immunosuppressive therapies/ Biologics<sup>1</sup></b> |         | Infliximab (L04AA12)<br>Adalimumab (L04AA17)<br>Etanercept (L04AA11)<br>Anakinra (L04AA14)<br>Rituximab <sup>3</sup> (L01XC02)<br>Abatacept <sup>3</sup> (L04AA24)        |

<sup>1</sup> Analyzed together due to sample size limitations.

*Supplementary Table 3.* Odds ratios and 95% confidence intervals (CI) for the association of rheumatoid arthritis (RA) with intensive care unit admission for infection<sup>a</sup>

| <b>Variable</b>                                                   | <b>Odds Ratio<br/>(95% CI)</b> |
|-------------------------------------------------------------------|--------------------------------|
| <i>Model 1</i>                                                    |                                |
| RA vs. general population                                         | 1.74<br>(1.30, 2.31)           |
| <i>Model 2</i>                                                    |                                |
| RA vs. general population                                         | 1.22<br>(0.87, 1.70)           |
| Any corticosteroid, immunomodulatory or immunosuppressive therapy | 1.75<br>(1.35, 2.25)           |
| <i>Model 3</i>                                                    |                                |
| RA vs. general population                                         | 1.32<br>(0.90, 1.95)           |
| Corticosteroids                                                   | 1.97<br>(1.53, 2.52)           |
| Immunomodulatory therapy                                          | 0.90<br>(0.50, 1.61)           |
| Immunosuppressive therapy                                         | 1.16<br>(0.72, 1.88)           |

<sup>a</sup> Adjusted for sex, age, region of residence (urban vs. rural), socioeconomic status (in quintiles), Modified Charlson Index, disease duration, year of ICU admission
